# Supplementary material
Source: PubMed Central journal article supplement (PMC3157209)

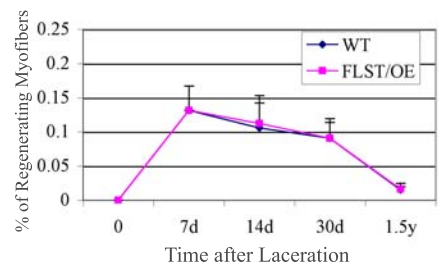

Supplement: mmc1.pdf [file mmc1.pdf]

Activin A+Collagen IV+Nuclei

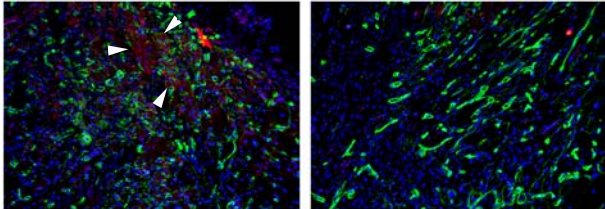

WT

FLST/OE

Supplement: mmc2.pdf [file mmc2.pdf]

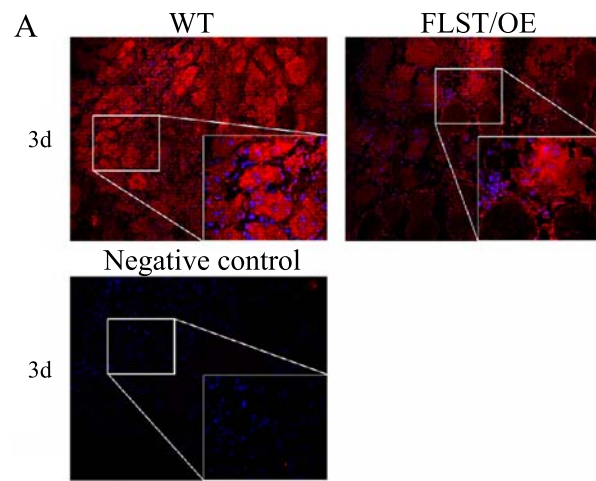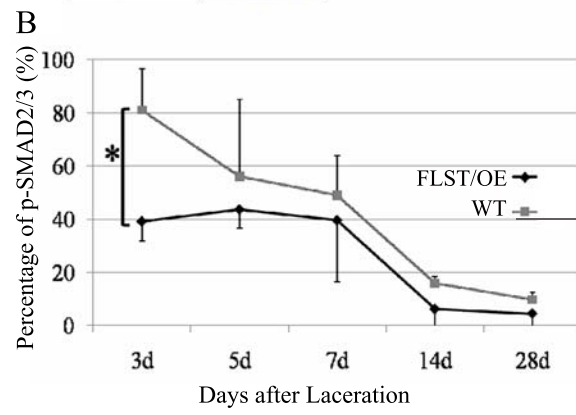

Supplement: mmc3.pdf [file mmc3.pdf]

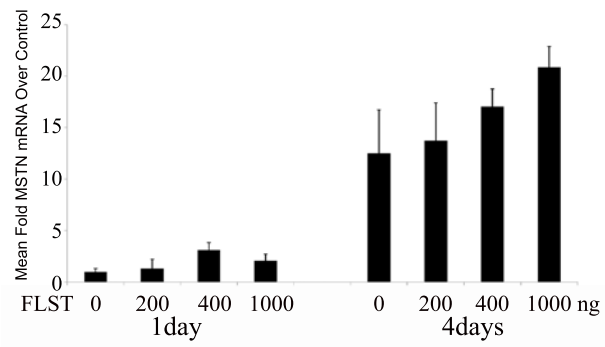

Supplement: mmc4.pdf [file mmc4.pdf]

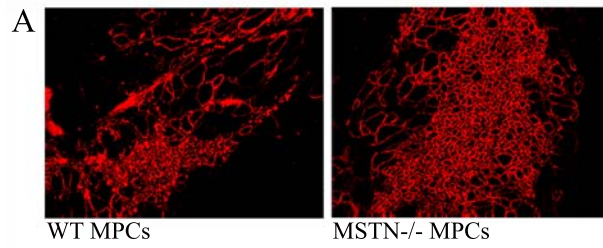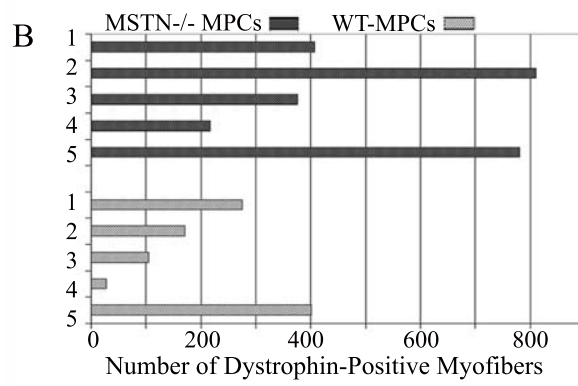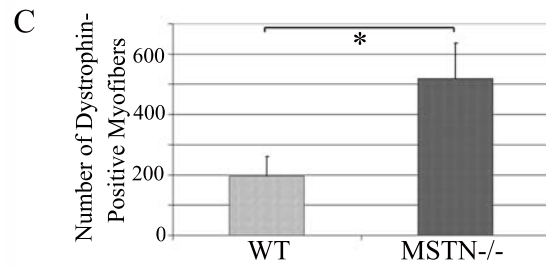

Supplement: mmc5.pdf [file mmc5.pdf]
